# Supplementary material
Source: PubMed Central journal article supplement (PMC6901515)
Supplement: 41386_2019_443_MOESM1_ESM.pdf [file 41386_2019_443_MOESM1_ESM.pdf]

## 1 SUPPLEMENTARY MATERIALS AND METHODS

2 ***Extracellular Slice Electrophysiology.*** Slices were kept at an ACSF interface in a humidified holding  
3 chamber for at least one hour prior to recordings. Slices were then transferred to a submersion-type  
4 recording chamber and superfused at a rate of 1.5 ml/min at room temperature (20-22°C). Concentric  
5 bipolar tungsten electrodes were used to electrically stimulate (100  $\mu$ s duration at 0.05 Hz) Schaffer  
6 collateral afferents in the stratum radiatum (SC-CA1), or temporoammonic afferents in the stratum  
7 lacunosum-moleculare (TA-CA1). Under standard experimental conditions, ACSF-filled recording  
8 pipettes (3-5 M $\Omega$ ) were placed in the stratum radiatum of the CA1 field to record field excitatory  
9 postsynaptic potentials (fEPSPs) evoked by Schaffer collateral stimulation. For dual  
10 electrophysiological recordings of SC- and TA-stimulation evoked fEPSPs, both SC and TA afferents  
11 were stimulated in an alternating fashion, and recording pipettes were placed in the stratum radiatum  
12 and the stratum lacunosum-moleculare of the CA1 field, respectively. Stimuli were set to 150% of  
13 threshold intensity, resulting in fEPSPs of 0.2-0.5 mV. Responses were amplified 1000x, filtered at 3  
14 kHz, and digitized at 10 kHz. pClamp software was used to analyze the slope (mV/ms) of the initial 1.5-  
15 ms rising phase of the fEPSP. Only recordings exhibiting a stable presynaptic fiber volley across the  
16 experiment and <15% increase/variation in the fEPSP during baseline were included in the analyses.  
17 Modest changes in the fiber volley occurred as a result of nominally Mg<sup>2+</sup>-free conditions, and were  
18 accounted for by normalizing the slope of the fEPSP to the fiber volley amplitude on a response-by-  
19 response basis. Test compounds were applied by bath application. Individual slope values plotted as  
20 a function of time reflect the mean of three consecutive sweeps (1 min). Paired pulse ratios with an  
21 interstimulus interval of 50 ms were generated at the end of the baseline recording, and again, during  
22 the last minute of the test compound superfusion; paired pulse values were calculated from the mean  
23 of five consecutive sweeps, second pulse (P2)/first pulse (P1). Change in paired pulse was calculated  
24 as  $P2-P1/P1 \times 100$ .

25 ***Whole-cell Slice Electrophysiology.*** Slices were stored in an immersion ACSF holding chamber for  
26 at least one hour, at which time they were transferred to a submersion-type recording chamber and

27 superfused at a rate of 2 ml/min at room temperature (20-22°C). Recording pipettes (3.5-5 MΩ) were  
28 filled with a solution that contained (in mM): 130 Cs methanesulfonate, 10 CsCl; 2 MgCl<sub>2</sub>, 10 EGTA, 20  
29 CsOH, 10 HEPES (pH adjusted with CsOH to 7.3). mEPSCs were recorded using an LM-EPC7  
30 amplifier (List Electronic, Darmstadt, Germany), filtered at 3 kHz, digitized at 10 kHz (Digidata 1332A,  
31 Molecular Devices Corp., Union City, CA), and acquired using the Clampex 9.2 software (Molecular  
32 Devices Corp.). Amplitude and frequency of mEPSCs were analyzed using the Mini Analysis software  
33 (v. 6.0.7, Synaptosoft Inc., Fort Lee, NJ). mEPSCs were identified with the amplitude threshold of 4-5  
34 pA. The amplitude threshold for automated event detection was set at three times the standard  
35 deviation of the baseline noise. Events automatically detected by the software were visually inspected  
36 and manually rejected if they did not show a typical synaptic waveform. The detection threshold was  
37 fixed for all recordings obtained from any given cell. Recordings exhibiting a stable baseline and a  
38 current leak below 100 pA were included in the analyses. Individual data points plotted as a function of  
39 time reflect the mean amplitude or mean frequency of mEPSCs recorded in 5 min bins. Cumulative  
40 distribution plots of mEPSC amplitude and interevent interval were generated using a total of 250  
41 events randomly selected from recordings obtained for the 5 min before and between 20 and 25 min  
42 after beginning of superfusion of the cells in each treatment group (VEH vs. (2*R*,6*R*)-HNK).

43 **Chemicals.** 6,7-dinitroquinoxaline-2,3(1*H*,4*H*)-dione (DNQX, 50 μM; Sigma-Aldrich, St. Louis, MO)  
44 was used to block the AMPAR-mediated component of the fEPSP, and 2-amino-5-phosphonopentanoic  
45 acid (AP5, 80 μM; Tocris) was used to block the NMDAR-mediated component of the fEPSP. The  
46 positive allosteric modulator of the AMPAR, phenyl-1,4-bis-alkylsulfonamide (CMPDA, 1 μM; Tocris)  
47 was used to potentiate AMPAR-mediated synaptic transmission. Recording ACSF for whole-cell  
48 mEPSCs contained the sodium channel blocker, tetrodotoxin (TTX, 0.3 μM; Enzo Life Sciences,  
49 Farmingdale, NY), and the NMDA-, GABA<sub>A</sub>-, and GABA<sub>B</sub> receptor blockers, AP5 (80 μM; Sigma-  
50 Aldrich, St. Louis, MO), picrotoxin (100 μM; Tocris), and CGP52432 (2 μM; Tocris), respectively.  
51 Recording pipettes for whole-cell experiments contained the sodium channel blocker, QX-314  
52 (Lidocaine *N*-ethyl bromide; Sigma-Aldrich, St. Louis, MO). In 80% of the cells, 6-cyano-7-

53 nitroquinoxaline-2,3-dione (CNQX, 10  $\mu$ M; Sigma-Aldrich, St. Louis, MO) was bath applied, confirming  
54 that mEPSCs were AMPAR-mediated. All compounds were diluted to their final concentration in ACSF.

55 ***Experimental Design and Statistical Analysis.*** Data, which were found to be normally distributed  
56 (D'Agostino & Pearson) and homogenous (Brown-Forsythe), are presented as mean  $\pm$  standard error  
57 of the mean. For extracellular slice electrophysiology experiments, statistical comparisons were made  
58 by comparing the mean baseline response to the mean response during the last 5 min of superfusion  
59 with the test compound. For whole-cell electrophysiology experiments, statistical comparisons were  
60 made by comparing the mean baseline results to the mean of results obtained during the first significant  
61 time-bin (15-20 min) of the superfusion of the slices with the test compounds. Within slice two-group  
62 comparisons were assessed with paired two-tailed Student's *t* tests, whereas between-slice two-group  
63 comparisons (e.g., whole-cell electrophysiology experiments) were assessed with unpaired Student's *t*  
64 tests. Cumulative distribution plots of inter-event intervals and amplitude were analyzed by the  
65 Kolmogorov-Smirnov test. Between group comparisons of three or more groups were assessed with  
66 one-way analysis of variance (ANOVA) followed by Holm-Šídák *post-hoc* comparisons. Two-way  
67 repeated measures ANOVA were used when drug condition (0.9% saline vehicle [VEH] vs. (2*R*,6*R*)-  
68 HNK) and pathway (SC-CA1 vs. TA-CA1; *repeated measure*), and when treatment (VEH vs. (2*R*,6*R*)-  
69 HNK) and time (*repeated measure*) were independent factors. If a significant interaction was detected,  
70 the Holm-Šídák *post-hoc* test was used for pairwise group comparisons. Planned comparisons were  
71 made once treatment effects were established at SC-CA1 synapses (e.g., SC-CA1 vs. TA-CA1 dual  
72 recording experiment). A four-parameter Hill function was used to derive the EC<sub>50</sub> and IC<sub>50</sub> from the  
73 concentration-response relationships, and linear regression was used to identify significant correlations  
74 between paired pulse ratios and fEPSP slopes.
